# Supplementary material for: Delayed maturation of GABAergic signaling in the Scn1a and Scn1b mouse models of Dravet Syndrome
Source: PubMed Central journal article supplement (PMC6470170; doi:10.1038/s41598-019-42191-0), 2019-04-17

**Supplementary Information:**

**Delayed maturation of GABAergic signaling in the *Scn1a* and *Scn1b* mouse models of Dravet Syndrome**

Yukun Yuan<sup>1\*</sup>, Heather A. O'Malley<sup>1\*</sup>, Melissa A. Smaldino<sup>1#</sup>, Alexandra A. Bouza<sup>1</sup>, Jacob M. Hull<sup>2</sup>, and Lori L. Isom<sup>1,2\*\*</sup>

<sup>1</sup>Department of Pharmacology and <sup>2</sup>Neuroscience Graduate Program, University of Michigan, Ann Arbor, MI 48109-5632

\*These authors contributed equally to the work.

#Present address: Department of Biology, Ball State University, Muncie, IN 47306

\*\*Corresponding Author: [lisom@umich.edu](mailto:lisom@umich.edu), 734-936-3050

## Supplementary Figures

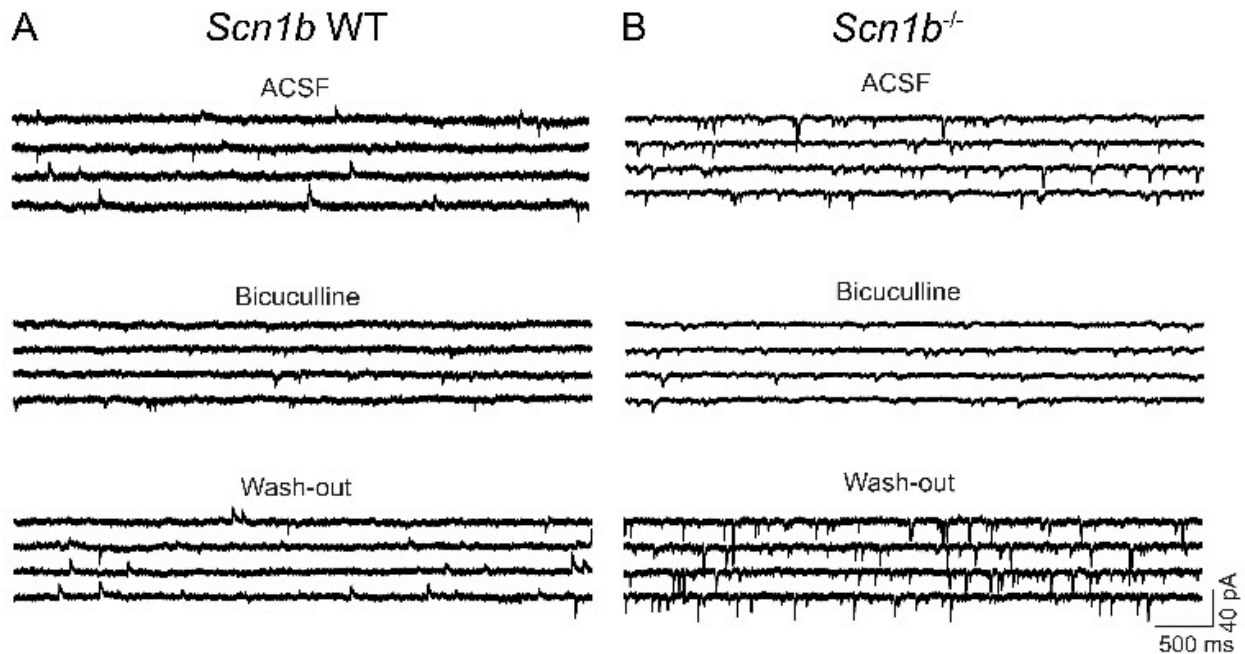

**Fig. S1: P17 *Scn1b*<sup>-/-</sup> brain shows bicuculline-sensitive spontaneous inward currents.** **A:** Representative spontaneous current events recorded with low  $[Cl^-]_i$  in a CA1 pyramidal cell of a hippocampal slice from a P17 WT mouse in the absence (top) or presence (middle) of 10  $\mu$ M bicuculline, and following washout with ACSF (bottom). The upward events were bicuculline-sensitive. Similar responses were also observed in cortical layer II/III neurons (data not shown). **B:** Representative spontaneous inward currents recorded with low  $[Cl^-]_i$  in a layer II/III pyramidal cell of a cortical slice from a P16 *Scn1b*<sup>-/-</sup> mouse in the absence (top) and presence of 10  $\mu$ M bicuculline (middle). Washout of bicuculline completely recovered spontaneous inward currents (bottom), demonstrating that the disappearance of these bicuculline-sensitive inward currents was not due to current rundown or other artifacts. Data are representative of 9 cells from 5 WT and 16 cells from 12 *Scn1b*<sup>-/-</sup> mice.

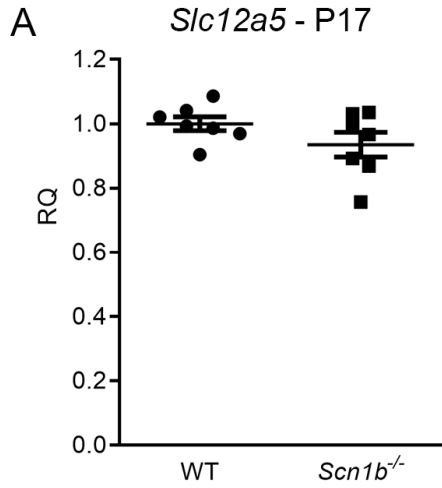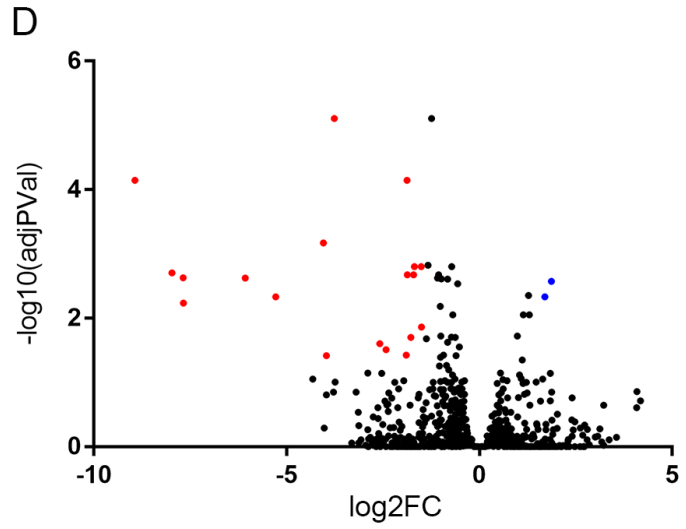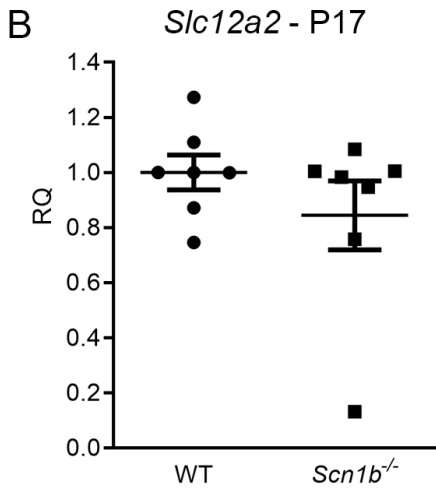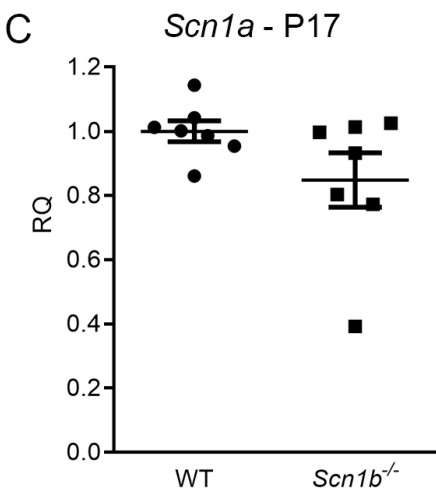

**E**

| Gene                   | Log2FC        | Adjusted P value |
|------------------------|---------------|------------------|
| Eif2s3y                | -8.938        | 7.16e-5          |
| Ddx3y                  | -7.975        | 0.002            |
| Uty                    | -7.689        | 0.002            |
| Kdm5d                  | -7.682        | 0.006            |
| Cpz                    | -6.074        | 0.002            |
| Txndc3                 | -5.281        | 0.005            |
| Pf4                    | -4.045        | 0.001            |
| 1700056E22Rik          | -3.967        | 0.038            |
| 1500015O10Rik          | -3.767        | 7.81e-6          |
| Itga2                  | -2.587        | 0.025            |
| Ebf2                   | -2.425        | 0.031            |
| Pkd2l2                 | -1.898        | 0.038            |
| Bmp6                   | -1.878        | 7.16e-5          |
| Col3a1                 | -1.869        | 0.002            |
| Pcolce                 | -1.780        | 0.020            |
| Col1a2                 | -1.712        | 0.002            |
| Spon2                  | -1.691        | 0.002            |
| Igf2                   | -1.512        | 0.002            |
| Thbd                   | -1.504        | 0.014            |
| Mybpc3                 | 1.864         | 0.003            |
| A930011O12Rik          | 1.696         | 0.005            |
| <b>NKCC1 (SLC12A2)</b> | <b>0.163</b>  | <b>1</b>         |
| <b>KCC2 (SLC12A5)</b>  | <b>0.106</b>  | <b>1</b>         |
| <b>WNK1</b>            | <b>0.170</b>  | <b>1</b>         |
| <b>STK39</b>           | <b>-0.025</b> | <b>1</b>         |

**Fig. S2: mRNA transcript levels and RNAseq results from *Scn1b* brain. A-C:** Relative mRNA transcript levels of **A.** *Slc12a5* (KCC2), **B.** *Slc12a2* (NKCC1), or **C.** *Scn1a* (Na<sub>v</sub>1.1) are not different between *Scn1b* WT and -/- brains at P17. Data are shown relative to WT. RQ: Relative quantity. **D:** Volcano plot showing differentially expressed genes in P10 *Scn1b* WT or -/- cortical layer VI. Red: Downregulated genes, Blue: upregulated genes ( $\log_2FC \geq 1.5$  and false discovery rate  $\leq 0.05$ ). **E:** Table showing genes differentially expressed between *Scn1b* WT and -/- cortical layer VI. In addition, there were no differences in expression between genotypes for the genes encoding NKCC1, KCC2, WNK1, or STK39.

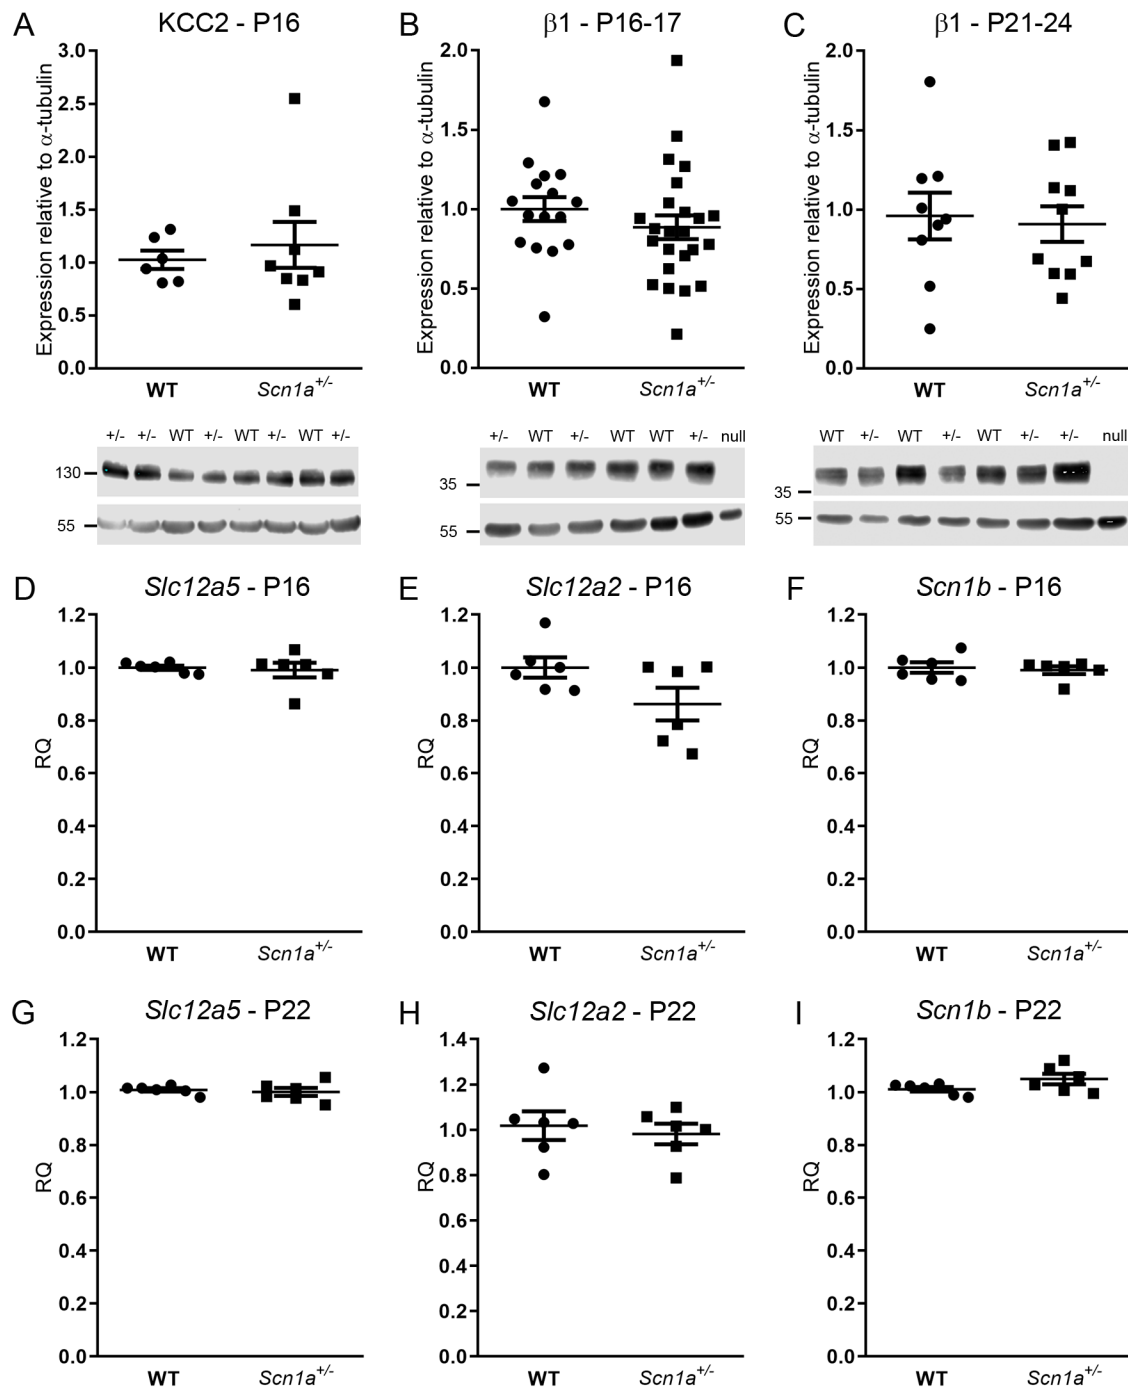

**Fig. S3: Protein expression of KCC2 or  $\beta$ 1 and mRNA expression of *Slc12a5*, *Slc12a2*, or *Scn1b* in *Scn1a* WT or +/- mouse brain. A-C: Protein expression levels of KCC2 and  $\beta$ 1 are not different between *Scn1a* WT and +/- mouse brains. A: KCC2 protein expression at P16. Top: Quantification of KCC2 expression in *Scn1a* WT vs +/- brain,**

normalized to  $\alpha$ -tubulin expression and shown relative to WT. Bottom: Representative Western blot image. **B**:  $\beta$ 1 protein expression at P16-17. Top: Quantification of  $\beta$ 1 expression in *Scn1a* WT vs +/- brain, normalized to  $\alpha$ -tubulin levels and shown relative to WT. Bottom: Representative Western blot image. **C**:  $\beta$ 1 protein expression at P21-24. Top: Quantification of  $\beta$ 1 expression in *Scn1a* WT vs +/- brain, normalized to  $\alpha$ -tubulin levels and shown relative to WT. Bottom: Representative Western blot image.  $\beta$ 1 null brain membranes were used as a negative control in **B** and **C**. **D-I**: Relative mRNA transcript levels of *Slc12a5* (KCC2), *Slc12a2* (NKCC1), and *Scn1b* ( $\beta$ 1) are not different between *Scn1a* WT and +/- mice at P16 or P22. Data are shown relative to WT. **D**: Relative transcript levels of *Slc12a5* at P16. **E**: Relative transcript levels of *Slc12a2* at P16. **F**: Relative transcript levels of *Scn1b* at P16. **G**: Relative transcript levels of *Slc12a5* at P22. **H**: Relative transcript levels of *Slc12a2* at P22. **I**: Relative transcript levels of *Scn1b* at P22. RQ: Relative quantity.

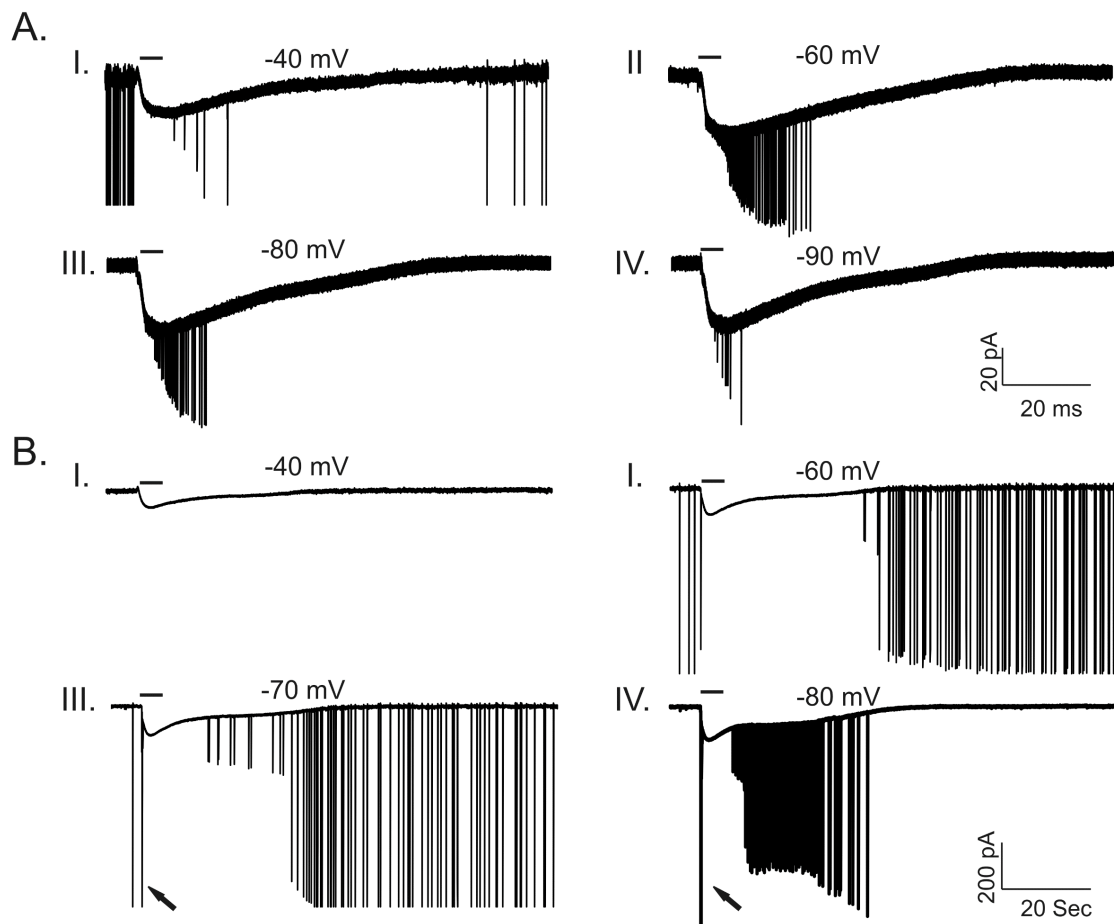

**Fig. S4: GABA induces excitatory responses in *Scn1a*<sup>+/-</sup> neurons. A, B:**

Representative traces of GABA-evoked responses at different membrane holding potentials after establishing gramicidin perforated patch recording in two representative *Scn1a*<sup>+/-</sup> neurons. At membrane potentials more hyperpolarized than -60 mV (-70 and -80 mV are shown), puff application of GABA induced AP firing (arrows in **B-III** and **B-IV**). Each trace is representative of results from 6 individual mice.

**Supplementary Tables:**

| Patient | Variant              | Growth Parameters |             |            |             |            |           |            |
|---------|----------------------|-------------------|-------------|------------|-------------|------------|-----------|------------|
|         |                      | Age               | Weight (kg) | Percentile | Height (cm) | Percentile | Head (cm) | Percentile |
| 1       | c.449-2A>G           | 6 months          | 7.6         | 50-75      | 63          | 10-25      | 42.5      | 50         |
|         |                      | 7 months          | 7.6         | 50         | 67.7        | 50         | 43        | 50         |
|         |                      | 9 months          | 8.5         | 50         | 66          | 50         | 44.5      | 50         |
|         |                      | 30 months         | 10.7        | <5         | 81          | <5         | 47        | <5         |
| 2       | c.449-2A>G           | 3 months          | 5.4         | 50         | 57          | 10         | 40        | 50         |
|         |                      | 8 months          | 8           | 25-50      | 68          | 25         | 43        | 50-75      |
| 3       | c.355T>G:<br>p.Y119D | 10 years          | 11.52       | <1         | 90          | <1         | 43.5      | <1         |

**Table S1:** Growth parameters of *SCN1B*-linked DS patients at multiple developmental milestones. Head: head circumference.



Original full-length images of Western blots are provided below:

Fig5A - KCC2

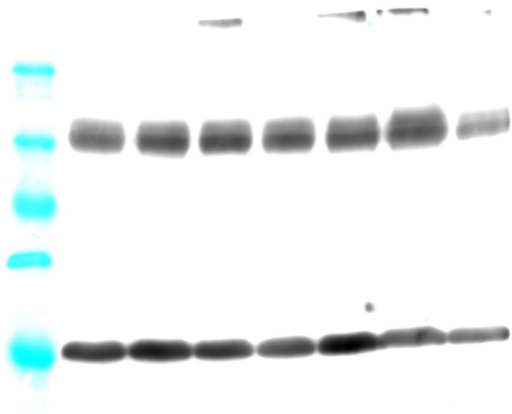

Fig. 5A - loading controls

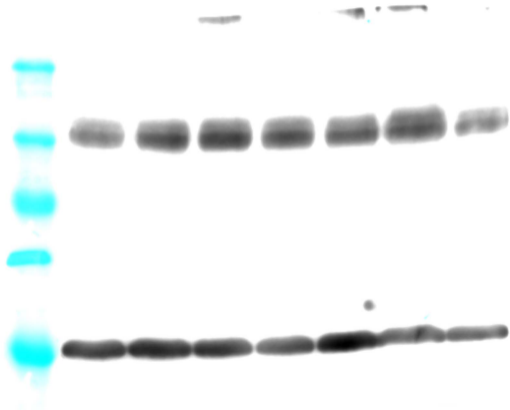

Fig. 5B, KCC2 and loading controls

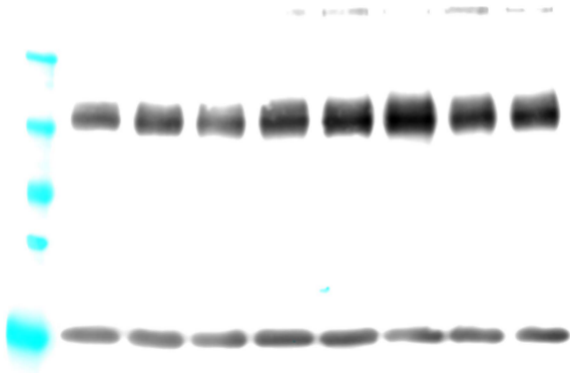

Fig. 5C - KCC2, lane 1 omitted

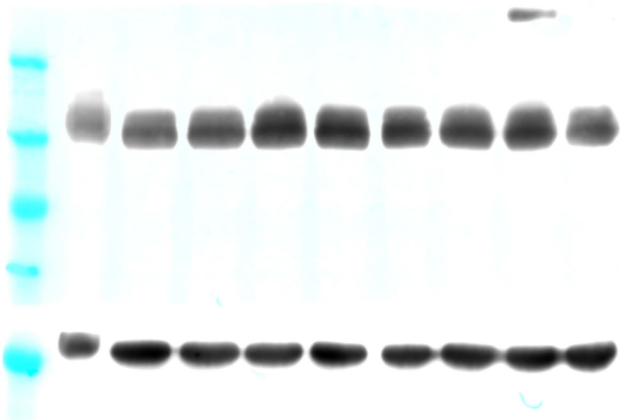

Fig. 5C - loading control, lane 1 omitted

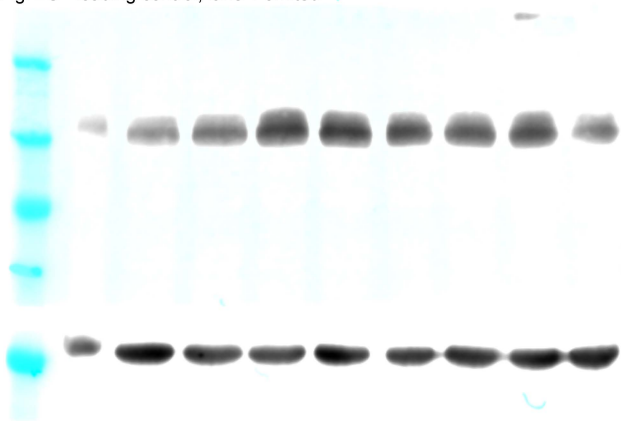

Fig. 5E, IP lanes and control

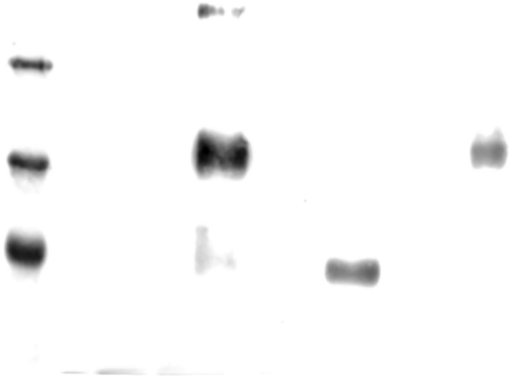

Fig. 5F - controls

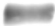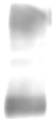



Fig. 5F - IP lanes

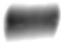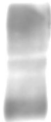



Fig. 5G - IP lanes

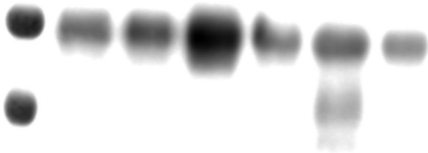

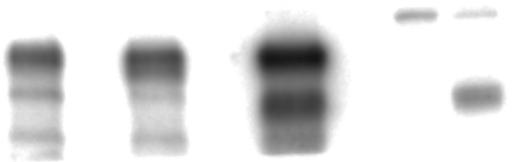

Fig. 5H - controls

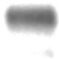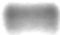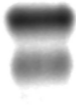

Fig. 5H - IP lanes

Supp. Fig. 4A - KCC2

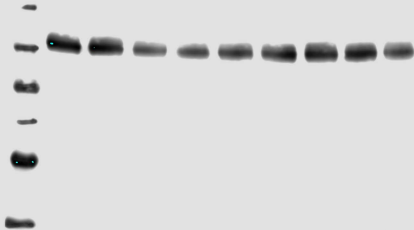

# Supp. Fig. 4A - loading controls

55

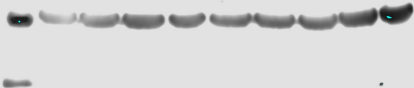

Supp. Fig. 4B -  $\beta 1$ , lanes 3-9 shown in figure

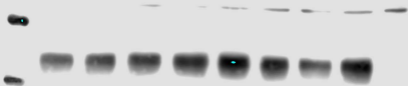



Supp. Fig. 4B - loading controls, lanes 3-9 shown

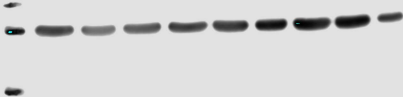

Supp. Fig. 4C -  $\beta 1$  - lane 1 not shown

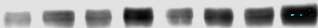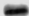

Supp. Fig. 4C - loading controls, lane 1 not shown

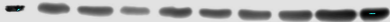

Supplement: 41598_2019_42191_MOESM1_ESM.pdf [file 41598_2019_42191_MOESM1_ESM.pdf]
